# Supplementary material
Source: Springer Nature journal article supplement (https://www.springermedizin.de/resource/supplementary/12936_2006_375_MOESM1_ESM.pdf/9547668)

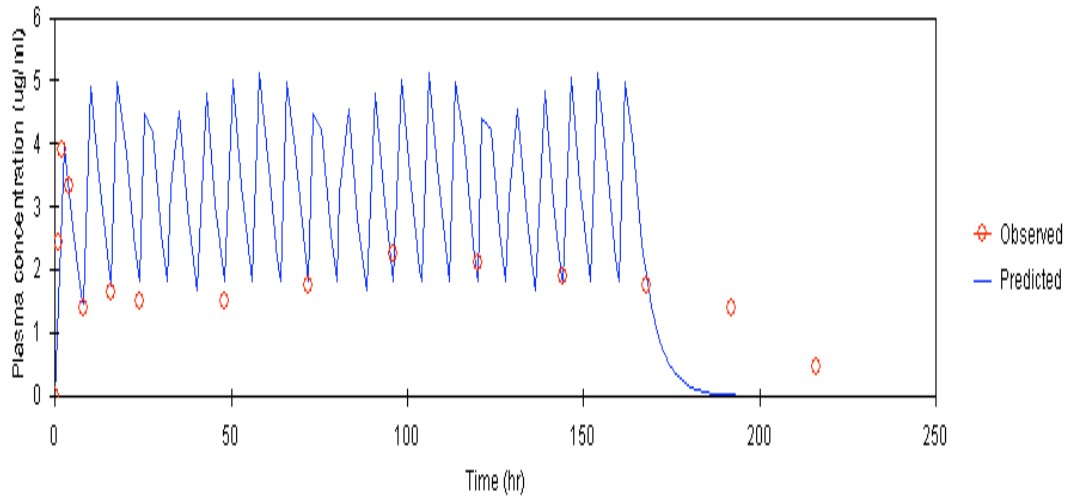

(a)

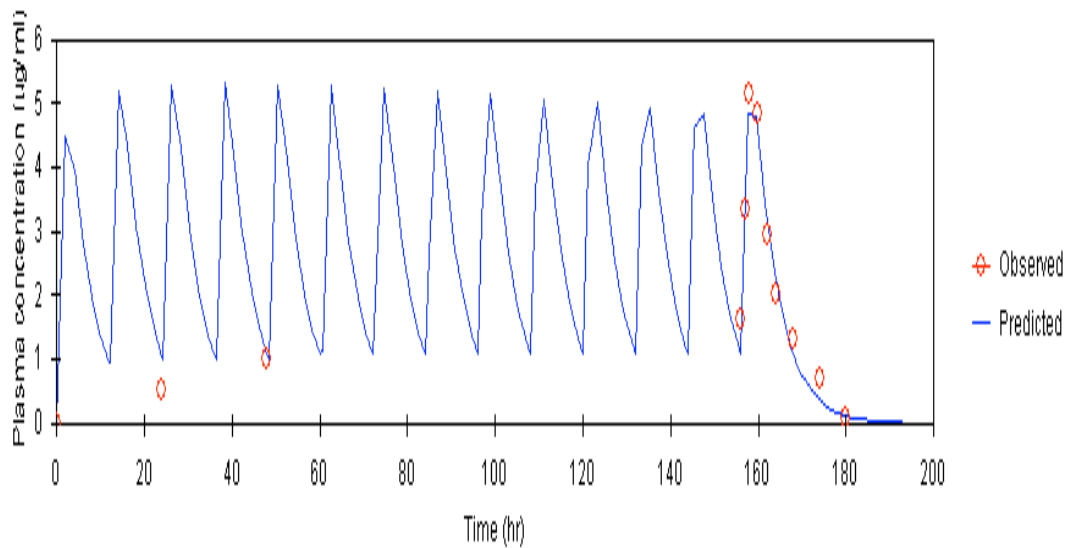

(b)

Supplement: MOESM1 [file 9547668]
